# Supplementary material for: Fermented barley and soybean (BS) mixture enhances intestinal barrier function in dextran sulfate sodium (DSS)-induced colitis mouse model
Source: PubMed Central journal article supplement (PMC5135811; doi:10.1186/s12906-016-1479-0), 2016-12-03
Supplement: 12906_2016_1479_MOESM1_ESM.pdf [file 12906_2016_1479_MOESM1_ESM.pdf]

**Supplementary Table S1. Primer sets used for semi-quantitative PCR of cytokines**

| Gene Name       | Product Size | Sequence (5' to 3')                                                    |
|-----------------|--------------|------------------------------------------------------------------------|
| IL-1 $\beta$    | 282bp        | GCC TTG GGC CTC AAA GGA AAG AAT C<br>GGA AGA CAC AGA TTC CAT GGT GAA G |
| IL-6            | 155bp        | TGG AGT CAC AGA AGG AGT GGC TAA G<br>TCT GAC CAC AGT GAG GAA TGT CCA C |
| IL-12 p40       | 201bp        | GTC CTC AGA AGC TAA CCA TC<br>TTT CCA GAG CCT ATG ACT CC               |
| TNF $\alpha$    | 258bp        | ATA GCT CCC AGA AAA GCA AGC<br>CAC CCC GAA GTT CAG TAG ACA             |
| $\beta$ - actin | 349bp        | TGG AAT CCT GTG GCA TCC ATG AAA C<br>TAA AAC GCA GCT CAG TAA CAG TCC G |

Supplementary Table S2. Primer sets used for quantitative PCR of 16S rRNA of specific species or genus

| Target organism                         | Primer set | Product size | Sequence (5' to 3')         |
|-----------------------------------------|------------|--------------|-----------------------------|
| <b>Eubacteria</b>                       | UniF340    | 210          | ACT CCT ACG GGA GGC AGC AGT |
|                                         | UniR514    |              | ATT ACC GCG GCT GCT GGC     |
| <b>Lactobacillus</b>                    | LabF362    | 315          | AGC AGT AGG GAA TCT TCC A   |
|                                         | LabR677    |              | CAC CGC TAC ACA TGG AG      |
| <b>Bacteroides</b>                      | BactF285   | 53           | GGT TCT GAG AGG AGG TCC C   |
|                                         | UniR338    |              | GCT GCC TCC CGT AGG AGT     |
| <b>Faecalibacterium<br/>prausnitzii</b> | Fprau223F  | 199          | GAT GGC CTC GCG TCC GAT TAG |
|                                         | Fprau420R  |              | CCG AAG ACC TTC TTC CTC C   |
